# Supplementary material
Source: PubMed Central journal article supplement (PMC9372031)
Supplement: 43856_2022_168_MOESM1_ESM.pdf [file 43856_2022_168_MOESM1_ESM.pdf]

## **Description of Additional Supplementary Files**

**File Name:** Supplementary Data 1

**Description:** List of genome sequences from Puerto Rico generated by this study.
